# Supplementary material
Source: publisher site journal article supplement (https://www.dovepress.com/article/309310)
Supplement: Supplementary file 1 [file get_supplementary_file.php]

**Supplementary Table 1.** Clinical features and treatment of 20 patients with HCC-CL

| ID | Gender | Age (y) | Hepatitis | Tumor  location | Feeding artery | Superselective | Tumor  size (cm) | Tumor  number | BCLC  stage | TACE times | AFP  (μg/L) | CEA  (U/mL) | CA199  (ng/mL) | Seeds  number |
| --- | --- | --- | --- | --- | --- | --- | --- | --- | --- | --- | --- | --- | --- | --- |
| 1 | Female | 51 | HBV | Spigle lobe | Single | Yes | 3.0 | 1 | A | 4 | 2.3 | 5.9 | 9.1 | 18 |
| 2 | Male | 61 | HBV | Spigle lobe | Single | Yes | 2.6 | 1 | A | 6 | 4.2 | 2.0 | 15.7 | 30 |
| 3 | Male | 53 | N | Paracaval portion | Multiple | Yes | 3.6 | 1 | A | 1 | 2.8 | 3.4 | 12.3 | 30 |
| 4 | Female | 53 | HBV | Spigle lobe | Single | No | 2.1 | 1 | A | 1 | 384.9 | 1.9 | 25 | 10 |
| 5 | Male | 40 | HBV | Caudate process | Multiple | Yes | 2.3 | 1 | A | 4 | 1.5 | 1.9 | 18.1 | 5 |
| 6 | Male | 77 | N | Spigle lobe | Single | Yes | 2.1 | 1 | A | 3 | 16.1 | 3.1 | 5.9 | 6 |
| 7 | Male | 52 | HBV | Spigle lobe | Single | Yes | 6.8 | 1 | B | 12 | 161.3 | 4.2 | 8.5 | 17 |
| 8 | Male | 55 | HCV | Spigle lobe | Multiple | Yes | 4.3 | 3 | B | 9 | 5 | 2.9 | 7.9 | 7 |
| 9 | Male | 55 | HBV | Paracaval portion | Multiple | Yes | 2.8 | 2 | A | 5 | 4.4 | 3.6 | 11.7 | 55 |
| 10 | Male | 45 | HBV | Spigel lobe | Multiple | No | 7.5 | 1 | B | 4 | >2000 | 2.1 | 5.7 | 28 |
| 11 | Male | 42 | HBV | Paracaval portion | Multiple | Yes | 3.9 | 5 | B | 3 | >2000 | 3.8 | 16.8 | 14 |
| 12 | Male | 63 | HBV | Spigle lobe | Single | Yes | 5.0 | 1 | B | 5 | 4 | 3 | 7.1 | 17 |
| 13 | Male | 57 | HCV | Spigle lobe | Multiple | Yes | 7.8 | 1 | B | 4 | 26.4 | 3.9 | 5.3 | 29 |
| 14 | Male | 52 | HCV | Spigle lobe | Multiple | No | 4.3 | 1 | A | 8 | 25 | 2.7 | 9.4 | 11 |
| 15 | Male | 60 | N | Paracaval portion | Multiple | Yes | 3.1 | 3 | B | 10 | 11 | 3.3 | 19.6 | 9 |
| 16 | Female | 44 | HBV | Caudate process | Multiple | Yes | 2.3 | 2 | A | 5 | 429.7 | 2.9 | 22.4 | 7 |
| 17 | Male | 63 | HCV | Paracaval portion | Multiple | Yes | 2.9 | 1 | A | 2 | 1.6 | 3.1 | 5.2 | 13 |
| 18 | Male | 61 | HCV | Spigle lobe | Multiple | Yes | 5.6 | 2 | B | 2 | 5.8 | 1.1 | 5.4 | 19 |
| 19 | Male | 61 | HBV | Paracaval portion | Multiple | Yes | 4.0 | 4 | B | 3 | 223 | 4.8 | 7.5 | 11 |
| 20 | Male | 59 | HBV | Spigle lobe | Single | No | 7.5 | 1 | B | 3 | 23.3 | 3.3 | 22.8 | 31 |

*Abbreviations: BCLC, Barcelona clinic liver cancer;* *AFP, alpha-fetoprotein; TACE, transarterial chemoembolization;* *CL,caudate lobe; CA199, carbohydrate antigen 199;CEA,carcinoembryonic antigen.*

**Supplementary Table 2.** Main AEs and complications during and after TACE and ISI

|  | Any grades (n, %) | | | III or IV grades (n, %) | | |
| --- | --- | --- | --- | --- | --- | --- |
| Adverse events | CL (n=20) | NCL (n=57) | P value | CL (n=20) | NCL (n=57) | P-value |
| Fever | 16 (80.0) | 46 (80.7) | 0.946 | 2 (10.0) | 5 (8.8) | 0.871 |
| Abdominal pain | 13 (65.0) | 41 (71.9) | 0.560 | 3 (15.0) | 8 (14.0) | 0.916 |
| Fatigue | 9 (45.0) | 25 (43.9) | 0.930 | 1 (5.0) | 3 (5.3) | 0.963 |
| Nausea | 9 (45.0) | 23 (40.4) | 0.717 | 0 (0.0) | 0 (0.0) | >0.999 |
| Vomiting | 11 (55.0) | 32 (56.1) | 0.930 | 0 (0.0) | 2 (3.5) | >0.999 |
| Leukopenia | 5 (25.0) | 14 (24.6) | 0.969 | 0 (0.0) | 0 (0.0) | >0.999 |
| Decreased appetite Bleeding of puncture tract  Pneumothorax  Biliary tract injury | 12 (60.0)  2 (10.0)  1 (5.0)  1 (5.0) | 38 (66.7)  4 (7.0)  3 (5.3)  0 (0.0) | 0.591  0.676  0.963  0.260 | 1 (5.0)  0 (0.0)  0 (0.0)  0 (0.0) | 2 (3.5)  0 (0.0)  0 (0.0)  0 (0.0) | >0.999  >0.999  >0.999  >0.999 |

*Abbreviations: AEs, adverse events; TACE, transarterial chemoembolization; ISI, iodine 125 seeds implantation*;

*CL, caudate lobe; NCL, non-caudate lobe.*
